# Supplementary material for: Serine, N-acetylaspartate differentiate adolescents with juvenile idiopathic arthritis compared with healthy controls: a metabolomics cross-sectional study
Source: Springer Nature journal article supplement (doi:10.1186/s12969-022-00672-z), 2022-02-10

# Citrate Cycle (TCA Cycle)

## Legend

■ significantly different

■ found, but not significantly different

\* adjusted  $p < 0.05$

\*\* detected in one group only

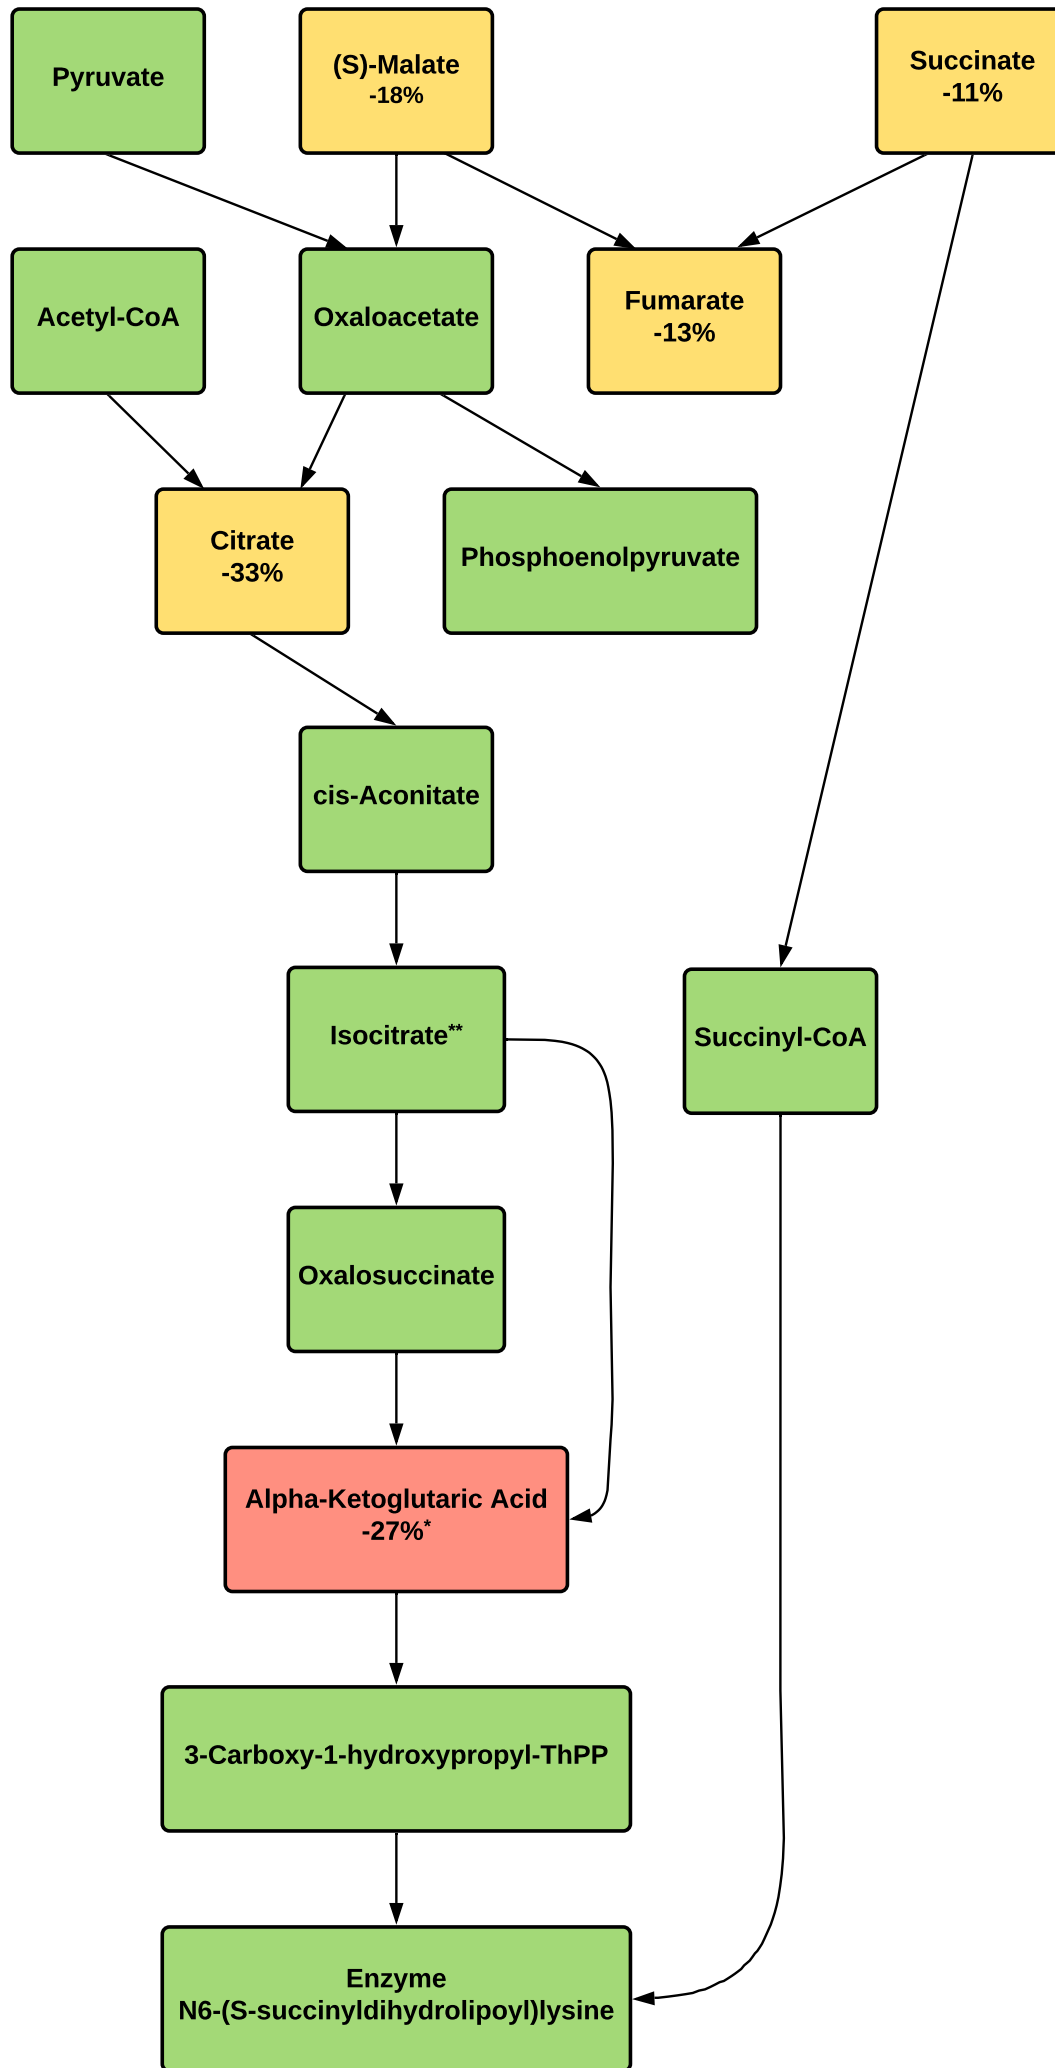

Supplement: MOESM1 [file 20122290]
