# Supplementary material for: Serine, N-acetylaspartate differentiate adolescents with juvenile idiopathic arthritis compared with healthy controls: a metabolomics cross-sectional study
Source: Springer Nature journal article supplement (doi:10.1186/s12969-022-00672-z), 2022-02-10
Supplement: MOESM3 [file 20122290]

# JIA Analysis

EDG

5/5/2021

## Contents

|                                                          |           |
|----------------------------------------------------------|-----------|
| <b>Setup</b>                                             | <b>1</b>  |
| Libraries . . . . .                                      | 1         |
| Data . . . . .                                           | 1         |
| Scale . . . . .                                          | 1         |
| <b>Metabolite Group Differences: T-tests</b>             | <b>1</b>  |
| <b>Metabolite Group Differences with covariates: GLM</b> | <b>3</b>  |
| Plot . . . . .                                           | 5         |
| <b>Metabolite Levels vs. Time Since Diagnosis</b>        | <b>6</b>  |
| Pearson's r . . . . .                                    | 7         |
| Spearman's rho . . . . .                                 | 8         |
| <b>Metabolite Levels vs. Physician Global Assessment</b> | <b>10</b> |
| Pearson's r . . . . .                                    | 10        |
| Spearman's rho . . . . .                                 | 11        |

## Setup

### Libraries

### Data

```
datsn <- readRDS("../Data/datsn.rds")
```

### Scale

```
met_scaled <- as.data.frame(scale(datsn[, 26:80]))
```

## Metabolite Group Differences: T-tests

T-tests with Holm correction for multiple comparisons

```

jia_met_ttest <- lapply(seq(met_scaled), \ (i) t.test(met_scaled[, i] ~ datsn$Group))
jia_met_ttest_summary <- data.frame(Metabolite = names(met_scaled))
jia_met_ttest_summary <- cbind(jia_met_ttest_summary,
                              t(sapply(jia_met_ttest, \ (i)
                                       data.frame(`t-statistic` = i$statistic,
                                                `p-value` = i$p.value))))
jia_met_ttest_summary$`Holm-adjusted p-value` <- p.adjust(jia_met_ttest_summary$p.value,
                                                         method = "holm")
jia_met_ttest_summary$`FDR-adjusted p-value` <- p.adjust(jia_met_ttest_summary$p.value,
                                                         method = "fdr")
kable(jia_met_ttest_summary, align = "r", row.names = FALSE)

```

| Metabolite              | t.statistic | p.value      | Holm-adjusted p-value | FDR-adjusted p-value |
|-------------------------|-------------|--------------|-----------------------|----------------------|
| Lactate                 | 2.186901    | 0.0357373    | 1.0000000             | 0.1156207            |
| Malate                  | 3.529327    | 0.001177516  | 0.0565207             | 0.0080954            |
| 3-Hydroxykynurenine     | 0.7184789   | 0.4778709    | 1.0000000             | 0.7288919            |
| 4-Guanidinobutanoate    | -0.02011001 | 0.9840745    | 1.0000000             | 0.9840745            |
| 5-6-Dihydrouracil       | 0.2016787   | 0.8413334    | 1.0000000             | 0.9129293            |
| 5-Methyl-Cytosine       | 0.6297059   | 0.5327573    | 1.0000000             | 0.7288919            |
| 5-Oxolproline           | 0.6932582   | 0.4928784    | 1.0000000             | 0.7288919            |
| Adenine                 | -0.257635   | 0.7983243    | 1.0000000             | 0.9052649            |
| Alpha-D-Glucose         | 4.127766    | 0.0002843546 | 0.0142177             | 0.0026066            |
| Alpha-Ketoglutaric_Acid | 5.020581    | 1.325711e-05 | 0.0007026             | 0.0002430            |
| Beta-Alanine            | 0.4311453   | 0.6688779    | 1.0000000             | 0.8555415            |
| Betaine                 | 0.6744346   | 0.504399     | 1.0000000             | 0.7288919            |
| Citrate                 | 4.811946    | 2.71169e-05  | 0.0014101             | 0.0003729            |
| Citrulline              | 2.453104    | 0.01904446   | 0.8189117             | 0.0805727            |
| Creatine                | -0.2671628  | 0.7908291    | 1.0000000             | 0.9052649            |
| Creatinine              | 0.1459697   | 0.8847558    | 1.0000000             | 0.9153440            |
| Cytidine                | -1.071919   | 0.2907375    | 1.0000000             | 0.5330187            |
| Deoxycarnitine          | -0.7896664  | 0.4347554    | 1.0000000             | 0.7245923            |
| D-Pantothenic_Acid      | -0.2997811  | 0.7663515    | 1.0000000             | 0.9052649            |
| D-Ribose-5-Phosphate    | 0.1949261   | 0.8465345    | 1.0000000             | 0.9129293            |
| Fumarate                | 1.428042    | 0.1616806    | 1.0000000             | 0.3488861            |
| Glycerol                | 1.458751    | 0.1531101    | 1.0000000             | 0.3488861            |
| Glycine                 | -3.71795    | 0.001000909  | 0.0490446             | 0.0078643            |
| Guanosine               | -0.1281821  | 0.8987014    | 1.0000000             | 0.9153440            |
| Homocysteine            | 1.115475    | 0.2719664    | 1.0000000             | 0.5330187            |
| Inosine                 | -0.1339504  | 0.8941768    | 1.0000000             | 0.9153440            |
| L-Arginine              | -0.3494344  | 0.7289721    | 1.0000000             | 0.8909659            |
| L-Asparagine            | -0.5303817  | 0.5990164    | 1.0000000             | 0.7844262            |
| L-Carnitine             | -1.085005   | 0.2859545    | 1.0000000             | 0.5330187            |
| L-Cystine               | -4.435975   | 0.0001642153 | 0.0083750             | 0.0018064            |
| L-Eucine                | 1.576255    | 0.1267853    | 1.0000000             | 0.3169632            |
| L-Glutamine             | 1.416845    | 0.164928     | 1.0000000             | 0.3488861            |
| L-Histidine             | 2.237901    | 0.03171576   | 1.0000000             | 0.1090229            |
| L-Isoleucine            | 0.6989755   | 0.4895074    | 1.0000000             | 0.7288919            |
| L-Kynurenine            | 0.6440178   | 0.5263491    | 1.0000000             | 0.7288919            |
| L-Methionine            | 1.672433    | 0.1030556    | 1.0000000             | 0.2950846            |
| L-Phenylalanine         | 2.724009    | 0.009857846  | 0.4337452             | 0.0451818            |
| L-Proline               | 2.356714    | 0.0245927    | 1.0000000             | 0.0966142            |
| L-Serine                | 26.47496    | 9.336695e-17 | 0.0000000             | 0.0000000            |
| L-Threonine             | 0.6142679   | 0.5433558    | 1.0000000             | 0.7288919            |

| Metabolite               | t.statistic | p.value      | Holm-adjusted p-value | FDR-adjusted p-value |
|--------------------------|-------------|--------------|-----------------------|----------------------|
| L-Tyrosine               | 2.296675    | 0.02740581   | 1.0000000             | 0.1004880            |
| Myristic_acid            | 3.223378    | 0.002688569  | 0.1236742             | 0.0147871            |
| Methyl-L-Histidine       | -1.281818   | 0.2082531    | 1.0000000             | 0.4242194            |
| N-Acetyl-DL-Methionine   | -0.3649125  | 0.7180391    | 1.0000000             | 0.8909659            |
| N-Acetyl-DL-Serine       | 2.83829     | 0.007385132  | 0.3323309             | 0.0369257            |
| N-Acetylglycine          | 0.6781774   | 0.5023467    | 1.0000000             | 0.7288919            |
| N-Acetyl-L-Aspartic_Acid | 13.19133    | 9.257062e-14 | 0.0000000             | 0.0000000            |
| N-Acetylputrescine       | 1.491702    | 0.1447816    | 1.0000000             | 0.3462168            |
| Acetylcarnitine          | 1.619881    | 0.1139611    | 1.0000000             | 0.2984696            |
| Pipecolate               | 0.8480414   | 0.4035521    | 1.0000000             | 0.6936051            |
| Spermidine               | -0.2466971  | 0.8065087    | 1.0000000             | 0.9052649            |
| Succinate                | 1.650792    | 0.1073035    | 1.0000000             | 0.2950846            |
| Transaconitate           | 2.048311    | 0.04793854   | 1.0000000             | 0.1464789            |
| Uracil                   | 3.369733    | 0.001778222  | 0.0835764             | 0.0108669            |
| Urocanate                | 0.8700457   | 0.390216     | 1.0000000             | 0.6923187            |

Which metabolites have significant t-test p-values after correction?

Holm-adjusted:

```
sigholm_ttest <- which(jia_met_ttest_summary$`Holm-adjusted p-value` < .05)
jia_met_ttest_summary$Metabolite[sigholm_ttest]
```

```
[1] "Alpha-D-Glucose"      "Alpha-Ketoglutaric_Acid" "Citrate"      "Glycine"
[5] "L-Cystine"           "L-Serine"              "N-Acetyl-L-Aspartic_Acid"
```

FDR-adjusted:

```
sigfdr_ttest <- which(jia_met_ttest_summary$`FDR-adjusted p-value` < .05)
jia_met_ttest_summary$Metabolite[sigfdr_ttest]
```

```
[1] "Malate"              "Alpha-D-Glucose"      "Alpha-Ketoglutaric_Acid" "Citrate"
[5] "Glycine"            "L-Cystine"           "L-Phenylalanine"      "L-Serine"
[9] "Myristic_acid"     "N-Acetyl-DL-Serine"  "N-Acetyl-L-Aspartic_Acid" "Uracil"
```

## Metabolite Group Differences with covariates: GLM

```
jia_met_glm <- lapply(seq(met_scaled), \(i) glm(met_scaled[, i] ~ datsn$Group +
                                                datsn$Age + datsn$Sex +
                                                datsn$Meds_Rheum + datsn$Meds_Nonrheum,
                                                family = "gaussian"))
names(jia_met_glm) <- names(met_scaled)
jia_met_glm_summary <- data.frame(Metabolite = names(met_scaled))
jia_met_glm_summary <- cbind(jia_met_glm_summary,
                             t(sapply(jia_met_glm, \(i) {
                               .GroupJIA <- summary(i)$coefficient[2, ]
                               data.frame(`Coefficient` = .GroupJIA[["Estimate"]],
                                           `p-value` = .GroupJIA[["Pr(>|t|)"]])
                             })))
jia_met_glm_summary$`Holm-adjusted p-value` <- p.adjust(jia_met_glm_summary$p.value, method =
```

```
jia_met_glm_summary$`FDR-adjusted p-value` <- p.adjust(jia_met_glm_summary$p.value, method = "
kable(jia_met_glm_summary, align = "r", row.names = FALSE, digits = 4)
```

| Metabolite               | Coefficient | p.value      | Holm-adjusted p-value | FDR-adjusted p-value |
|--------------------------|-------------|--------------|-----------------------|----------------------|
| Lactate                  | -0.6903195  | 0.1689952    | 1.0000                | 0.3718               |
| Malate                   | -1.200449   | 0.005422104  | 0.2603                | 0.0373               |
| 3-Hydroxykynurenine      | -1.084635   | 0.02780372   | 1.0000                | 0.1019               |
| 4-Guanidinobutanoate     | -0.5691045  | 0.2266426    | 1.0000                | 0.4617               |
| 5-6-Dihydrouracil        | 0.2882152   | 0.588212     | 1.0000                | 0.7637               |
| 5-Methyl-Cytosine        | -0.7446801  | 0.1611632    | 1.0000                | 0.3693               |
| 5-Oxolproline            | -0.103517   | 0.8446467    | 1.0000                | 0.8934               |
| Adenine                  | -0.2710157  | 0.5970971    | 1.0000                | 0.7637               |
| Alpha-D-Glucose          | -1.628646   | 0.0002877638 | 0.0150                | 0.0040               |
| Alpha-Ketoglutaric_Acid  | -1.813999   | 3.447593e-05 | 0.0018                | 0.0006               |
| Beta-Alanine             | -0.2090596  | 0.6933903    | 1.0000                | 0.8303               |
| Betaine                  | -0.3611235  | 0.4957941    | 1.0000                | 0.7049               |
| Citrate                  | -1.334746   | 0.001775516  | 0.0870                | 0.0140               |
| Citrulline               | -0.7730851  | 0.09645386   | 1.0000                | 0.2526               |
| Creatine                 | 0.8515288   | 0.08270359   | 1.0000                | 0.2526               |
| Creatinine               | -0.1972678  | 0.6200222    | 1.0000                | 0.7750               |
| Cytidine                 | 0.3791109   | 0.3772907    | 1.0000                | 0.6288               |
| Deoxycarnitine           | -0.03266616 | 0.9460577    | 1.0000                | 0.9636               |
| D-Pantothenic_Acid       | -0.2790021  | 0.5893091    | 1.0000                | 0.7637               |
| D-Ribose-5-Phosphate     | -0.4031286  | 0.4345868    | 1.0000                | 0.6640               |
| Fumarate                 | -0.8062942  | 0.09251522   | 1.0000                | 0.2526               |
| Glycerol                 | -0.4127435  | 0.3650058    | 1.0000                | 0.6274               |
| Glycine                  | 1.56173     | 0.000411657  | 0.0210                | 0.0045               |
| Guanosine                | 0.1381015   | 0.7767331    | 1.0000                | 0.8718               |
| Homocysteine             | -0.1908088  | 0.7014652    | 1.0000                | 0.8303               |
| Inosine                  | 0.01717053  | 0.9724852    | 1.0000                | 0.9725               |
| L-Arginine               | -0.1499764  | 0.7580897    | 1.0000                | 0.8686               |
| L-Asparagine             | 0.8033012   | 0.09613341   | 1.0000                | 0.2526               |
| L-Carnitine              | 0.8559752   | 0.08949029   | 1.0000                | 0.2526               |
| L-Cystine                | 1.602693    | 0.0004920382 | 0.0246                | 0.0045               |
| L-Eucine                 | -1.227584   | 0.01378623   | 0.6204                | 0.0672               |
| L-Glutamine              | -0.4288286  | 0.4068472    | 1.0000                | 0.6581               |
| L-Histidine              | -0.3652667  | 0.4470324    | 1.0000                | 0.6645               |
| L-Isoleucine             | -0.5439145  | 0.2991594    | 1.0000                | 0.5485               |
| L-Kynurenine             | -1.125342   | 0.02531739   | 1.0000                | 0.0995               |
| L-Methionine             | -0.5562826  | 0.2778748    | 1.0000                | 0.5458               |
| L-Phenylalanine          | -1.224782   | 0.01049856   | 0.4934                | 0.0642               |
| L-Proline                | -0.3844127  | 0.4326505    | 1.0000                | 0.6640               |
| L-Serine                 | -1.90878    | 5.90479e-17  | 0.0000                | 0.0000               |
| L-Threonine              | 0.3280403   | 0.4998067    | 1.0000                | 0.7049               |
| L-Tyrosine               | -0.4780833  | 0.3485121    | 1.0000                | 0.6183               |
| Myristic_acid            | -0.463609   | 0.2953753    | 1.0000                | 0.5485               |
| Methyl-L-Histidine       | 0.1263642   | 0.8058513    | 1.0000                | 0.8864               |
| N-Acetyl-DL-Methionine   | -0.06068125 | 0.9075169    | 1.0000                | 0.9418               |
| N-Acetyl-DL-Serine       | -1.203735   | 0.01224508   | 0.5633                | 0.0672               |
| N-Acetylglycine          | -0.7288815  | 0.1571267    | 1.0000                | 0.3693               |
| N-Acetyl-L-Aspartic_Acid | -1.981372   | 1.375209e-10 | 0.0000                | 0.0000               |
| N-Acetylputrescine       | -0.8780158  | 0.0801201    | 1.0000                | 0.2526               |
| AcetylLcarnitine         | -0.7244277  | 0.1191086    | 1.0000                | 0.2978               |

| Metabolite     | Coefficient | p.value    | Holm-adjusted p-value | FDR-adjusted p-value |
|----------------|-------------|------------|-----------------------|----------------------|
| Pipecolate     | -0.174792   | 0.7095356  | 1.0000                | 0.8303               |
| Spermidine     | -0.3332325  | 0.5130738  | 1.0000                | 0.7055               |
| Succinate      | -0.6194766  | 0.1867588  | 1.0000                | 0.3951               |
| Transaconitate | -1.125657   | 0.01589317 | 0.6834                | 0.0672               |
| Uracil         | -1.18752    | 0.01527213 | 0.6720                | 0.0672               |
| Urocanate      | 0.1059911   | 0.84103    | 1.0000                | 0.8934               |

Which metabolites have significant coefficient p-values after correction?

Holm-adjusted:

```
sigholm_glm <- which(jia_met_glm_summary$`Holm-adjusted p-value` < .05)
jia_met_glm_summary$Metabolite[sig_glm]
```

```
[1] "Alpha-D-Glucose"      "Alpha-Ketoglutaric_Acid" "Glycine"                "L-Cystine"
[5] "L-Serine"             "N-Acetyl-L-Aspartic_Acid"
```

FDR-adjusted:

```
sigfdr_glm <- which(jia_met_glm_summary$`FDR-adjusted p-value` < .05)
jia_met_glm_summary$Metabolite[sigfdr_glm]
```

```
[1] "Malate"                "Alpha-D-Glucose"        "Alpha-Ketoglutaric_Acid" "Citrate"
[5] "Glycine"               "L-Cystine"              "L-Serine"                "N-Acetyl-L-Aspartic_Acid"
```

## Plot

Box plots of metabolites with significant group coefficients

```
rtlayout(6, 1)
for (i in sig_glm) {
  mplot3.box(split(met_scaled[, i], datsn$Group),
             main = labelify(names(met_scaled[i])),
             xlab = NA,
             mar = c(1.4, 4, 1.6, .5),
             horizontal = TRUE)
}
```

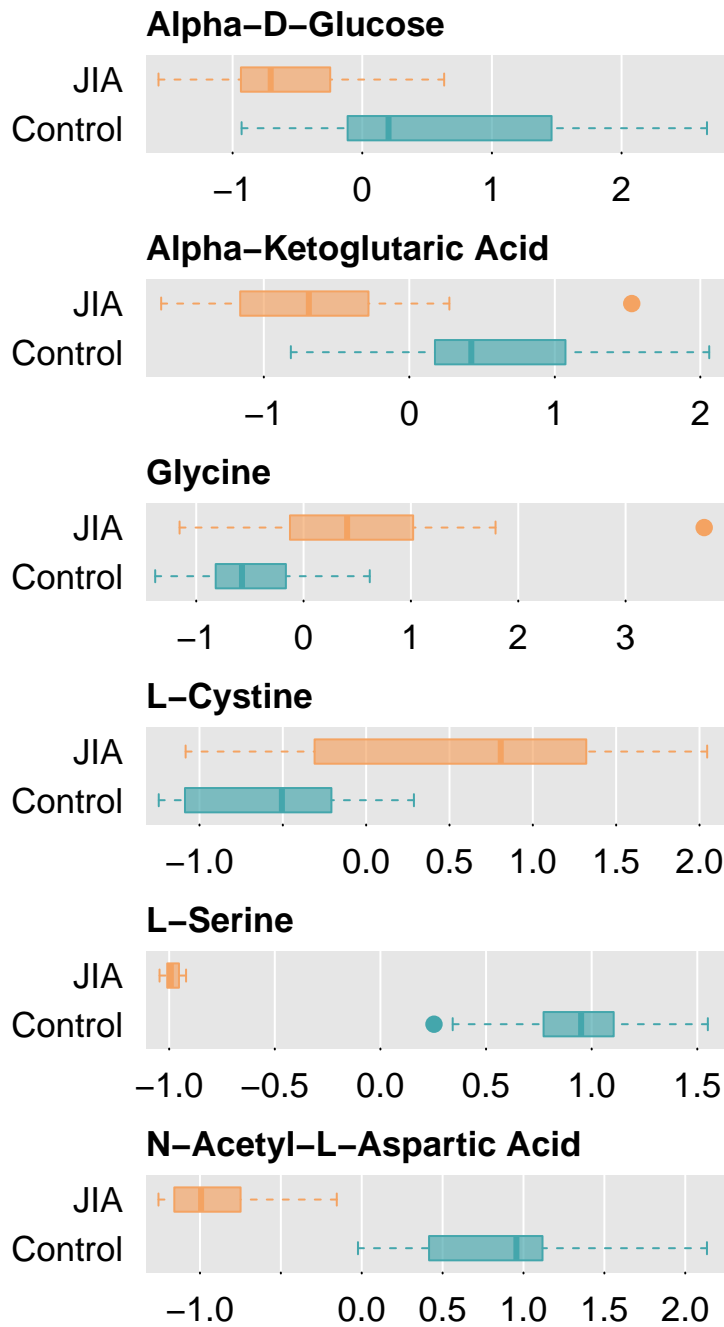

```
rtlayout()
```

## Metabolite Levels vs. Time Since Diagnosis

```
index_jia <- datsn$Group == "JIA"
```

## Pearson's r

```
jia_met_time_pearson <- lapply(seq(met_scaled),
                               \ (i) cor.test(met_scaled[index_jia, i],
                                                datsn$Time_Since_Diagnosis[index_jia],
                                                method = "pearson"))
jia_met_time_pearson_summary <- data.frame(Metabolite = names(met_scaled))
jia_met_time_pearson_summary <- cbind(jia_met_time_pearson_summary,
                                       t(sapply(jia_met_time_pearson, \ (i)
                                                data.frame(`Pearson's r` = i$statistic,
                                                           `p-value` = i$p.value))))
jia_met_time_pearson_summary$`Adjusted p-value` <-
  p.adjust(jia_met_time_pearson_summary$p.value, method = "holm")
kable(jia_met_time_pearson_summary, align = "r", row.names = FALSE)
```

| Metabolite              | Pearson.s.r  | p.value    | Adjusted p-value |
|-------------------------|--------------|------------|------------------|
| Lactate                 | 0.4212928    | 0.6788198  | 1.0000000        |
| Malate                  | 1.386369     | 0.1835493  | 1.0000000        |
| 3-Hydroxykynurenine     | 0.230608     | 0.8203717  | 1.0000000        |
| 4-Guanidinobutanoate    | -0.004258906 | 0.9966515  | 1.0000000        |
| 5-6-Dihydrouracil       | -0.6905045   | 0.499197   | 1.0000000        |
| 5-Methyl-Cytosine       | 0.5305116    | 0.6026192  | 1.0000000        |
| 5-Oxolproline           | -0.5871436   | 0.5648245  | 1.0000000        |
| Adenine                 | -1.852346    | 0.08142102 | 1.0000000        |
| Alpha-D-Glucose         | -0.3498878   | 0.7307201  | 1.0000000        |
| Alpha-Ketoglutaric_Acid | 0.8881595    | 0.3868492  | 1.0000000        |
| Beta-Alanine            | -0.745945    | 0.4658911  | 1.0000000        |
| Betaine                 | 2.228967     | 0.03959736 | 1.0000000        |
| Citrate                 | 0.7555076    | 0.4602851  | 1.0000000        |
| Citrulline              | 1.085472     | 0.2928661  | 1.0000000        |
| Creatine                | -0.04720437  | 0.9629005  | 1.0000000        |
| Creatinine              | -0.697333    | 0.4950215  | 1.0000000        |
| Cytidine                | -0.9709861   | 0.3451688  | 1.0000000        |
| Deoxycarnitine          | 2.291718     | 0.03495995 | 1.0000000        |
| D-Pantothenic_Acid      | -0.515509    | 0.6128363  | 1.0000000        |
| D-Ribose-5-Phosphate    | 0.7285078    | 0.4762194  | 1.0000000        |
| Fumarate                | -0.2065519   | 0.8388135  | 1.0000000        |
| Glycerol                | 1.778088     | 0.09327977 | 1.0000000        |
| Glycine                 | -1.170332    | 0.2580129  | 1.0000000        |
| Guanosine               | -0.3944407   | 0.6981601  | 1.0000000        |
| Homocysteine            | -1.208516    | 0.2433911  | 1.0000000        |
| Inosine                 | -0.4535935   | 0.6558582  | 1.0000000        |
| L-Arginine              | 1.039705     | 0.3130391  | 1.0000000        |
| L-Asparagine            | 1.055179     | 0.3061097  | 1.0000000        |
| L-Carnitine             | 0.05194707   | 0.9591764  | 1.0000000        |
| L-Cystine               | -1.019774    | 0.3221297  | 1.0000000        |
| L-Eucine                | 0.7974545    | 0.4361847  | 1.0000000        |
| L-Glutamine             | 0.1255097    | 0.9015924  | 1.0000000        |
| L-Histidine             | -2.224383    | 0.03995754 | 1.0000000        |
| L-Isoleucine            | 0.4068114    | 0.6892225  | 1.0000000        |
| L-Kynurenine            | 0.81042      | 0.4288985  | 1.0000000        |
| L-Methionine            | 0.6609769    | 0.5174854  | 1.0000000        |
| L-Phenylalanine         | 1.262137     | 0.223941   | 1.0000000        |

| Metabolite               | Pearson.s.r | p.value     | Adjusted p-value |
|--------------------------|-------------|-------------|------------------|
| L-Proline                | -0.6743488  | 0.5091567   | 1.0000000        |
| L-Serine                 | 0.2315568   | 0.8196465   | 1.0000000        |
| L-Threonine              | -0.8597396  | 0.4018944   | 1.0000000        |
| L-Tyrosine               | -0.6366414  | 0.5328381   | 1.0000000        |
| Myristic_acid            | -3.792096   | 0.001455611 | 0.0800586        |
| Methyl-L-Histidine       | 0.09310432  | 0.9269091   | 1.0000000        |
| N-Acetyl-DL-Methionine   | -0.5649823  | 0.5794659   | 1.0000000        |
| N-Acetyl-DL-Serine       | -0.07321936 | 0.9424862   | 1.0000000        |
| N-Acetylglycine          | 1.077057    | 0.2965022   | 1.0000000        |
| N-Acetyl-L-Aspartic_Acid | -0.2947842  | 0.7717282   | 1.0000000        |
| N-Acetylputrescine       | -1.606755   | 0.1265217   | 1.0000000        |
| AcetylLcarnitine         | 2.088299    | 0.05212599  | 1.0000000        |
| Pipecolate               | -1.455369   | 0.1637853   | 1.0000000        |
| Spermidine               | -0.1228579  | 0.9036604   | 1.0000000        |
| Succinate                | 0.7075967   | 0.4887839   | 1.0000000        |
| Transaconitate           | 0.0178729   | 0.9859483   | 1.0000000        |
| Uracil                   | -0.1177506  | 0.9076453   | 1.0000000        |
| Urocanate                | -1.097814   | 0.2875924   | 1.0000000        |

```
which(jia_met_time_pearson_summary$`Adjust p-value` < .05)
```

```
integer(0)
```

## Spearman's rho

```
jia_met_time_spearman <- lapply(seq(met_scaled),
                               \ (i) suppressWarnings(
                                   cor.test(met_scaled[index_jia, i],
                                             datsn$Time_Since_Diagnosis[index_jia],
                                             method = "spearman")))
jia_met_time_spearman_summary <- data.frame(Metabolite = names(met_scaled))
jia_met_time_spearman_summary <- cbind(jia_met_time_spearman_summary,
                                       t(sapply(jia_met_time_spearman, \ (i)
                                               data.frame(`spearman's r` = i$statistic,
                                                         `p-value` = i$p.value))))
jia_met_time_spearman_summary$`Adjusted p-value` <-
  p.adjust(jia_met_time_spearman_summary$p.value, method = "holm")
kable(jia_met_time_spearman_summary, align = "r", row.names = FALSE)
```

| Metabolite           | spearman.s.r | p.value    | Adjusted p-value |
|----------------------|--------------|------------|------------------|
| Lactate              | 1031.667     | 0.698772   | 1                |
| Malate               | 767.8557     | 0.1725532  | 1                |
| 3-Hydroxykynurenine  | 1072.793     | 0.8105369  | 1                |
| 4-Guanidinobutanoate | 1287.453     | 0.5976715  | 1                |
| 5-6-Dihydrouracil    | 1256.358     | 0.6775638  | 1                |
| 5-Methyl-Cytosine    | 999.5682     | 0.6153708  | 1                |
| 5-Oxolproline        | 1257.361     | 0.6749287  | 1                |
| Adenine              | 1684.675     | 0.03855387 | 1                |
| Alpha-D-Glucose      | 1211.219     | 0.7994389  | 1                |



| Metabolite               | spearman.s.r | p.value    | Adjusted p-value |
|--------------------------|--------------|------------|------------------|
| Alpha-Ketoglutaric_Acid  | 858.1333     | 0.3074748  | 1                |
| Beta-Alanine             | 1363.688     | 0.4207626  | 1                |
| Betaine                  | 602.3468     | 0.041496   | 1                |
| Citrate                  | 879.1981     | 0.3461523  | 1                |
| Citrulline               | 913.3029     | 0.4144138  | 1                |
| Creatine                 | 979.5065     | 0.5653745  | 1                |
| Creatinine               | 1503.117     | 0.1838198  | 1                |
| Cytidine                 | 1220.247     | 0.7746057  | 1                |
| Deoxycarnitine           | 598.3344     | 0.03979441 | 1                |
| D-Pantothenic_Acid       | 1069.784     | 0.8022101  | 1                |
| D-Ribose-5-Phosphate     | 947.4078     | 0.4893162  | 1                |
| Fumarate                 | 1122.948     | 0.9515359  | 1                |
| Glycerol                 | 587.3005     | 0.03539137 | 1                |
| Glycine                  | 1477.036     | 0.2191074  | 1                |
| Guanosine                | 1300.494     | 0.5653745  | 1                |
| Homocysteine             | 1223.256     | 0.766373   | 1                |
| Inosine                  | 1243.318     | 0.7121377  | 1                |
| L-Arginine               | 979.5065     | 0.5653745  | 1                |
| L-Asparagine             | 996.5589     | 0.6077597  | 1                |
| L-Carnitine              | 1030.664     | 0.6961089  | 1                |
| L-Cystine                | 1496.095     | 0.1929174  | 1                |
| L-Eucine                 | 931.3584     | 0.453272   | 1                |
| L-Glutamine              | 1229.275     | 0.7499802  | 1                |
| L-Histidine              | 1685.678     | 0.03814706 | 1                |
| L-Isoleucine             | 1050.725     | 0.7499802  | 1                |
| L-Kynurenine             | 884.2135     | 0.3557579  | 1                |
| L-Methionine             | 1071.79      | 0.8077591  | 1                |
| L-Phenylalanine          | 709.6768     | 0.1110978  | 1                |
| L-Proline                | 1255.355     | 0.6802026  | 1                |
| L-Serine                 | 1090.849     | 0.8608784  | 1                |
| L-Threonine              | 1480.046     | 0.2148256  | 1                |
| L-Tyrosine               | 1270.401     | 0.6410103  | 1                |
| Myristic_acid            | 1745.863     | 0.01919564 | 1                |
| Methyl-L-Histidine       | 1067.778     | 0.7966701  | 1                |
| N-Acetyl-DL-Methionine   | 1224.259     | 0.7636341  | 1                |
| N-Acetyl-DL-Serine       | 1321.558     | 0.5148828  | 1                |
| N-Acetylglycine          | 846.0963     | 0.2865936  | 1                |
| N-Acetyl-L-Aspartic_Acid | 1468.009     | 0.2322848  | 1                |
| N-Acetylputrescine       | 1481.049     | 0.2134106  | 1                |
| Acetylcarnitine          | 547.1771     | 0.02247344 | 1                |
| Pipecolate               | 1482.052     | 0.2120018  | 1                |
| Spermidine               | 1304.506     | 0.5555929  | 1                |
| Succinate                | 888.2258     | 0.3635512  | 1                |
| Transaconitate           | 1051.729     | 0.7527054  | 1                |
| Uracil                   | 1108.904     | 0.9117391  | 1                |
| Urocanate                | 1222.253     | 0.7691146  | 1                |

```
which(jia_met_time_spearman_summary$`Adjust p-value` < .05)
```

```
integer(0)
```

No correlations between metabolite levels and time since diagnosis are significant

## Metabolite Levels vs. Physician Global Assessment

### Pearson's r

```
jia_met_global_pearson <- lapply(seq(met_scaled),
                                \ (i) cor.test(met_scaled[index_jia, i],
                                                datsn$Physician_Global_Assessment[index_jia],
                                                method = "pearson"))
jia_met_global_pearson_summary <- data.frame(Metabolite = names(met_scaled))
jia_met_global_pearson_summary <- cbind(jia_met_global_pearson_summary,
                                         t(sapply(jia_met_time_pearson, \ (i)
                                                  data.frame(`Pearson's r` = i$statistic,
                                                            `p-value` = i$p.value))))
jia_met_global_pearson_summary$`Adjusted p-value` <-
  p.adjust(jia_met_global_pearson_summary$p.value, method = "holm")
kable(jia_met_global_pearson_summary, align = "r", row.names = FALSE)
```

| Metabolite              | Pearson.s.r  | p.value    | Adjusted p-value |
|-------------------------|--------------|------------|------------------|
| Lactate                 | 0.4212928    | 0.6788198  | 1.0000000        |
| Malate                  | 1.386369     | 0.1835493  | 1.0000000        |
| 3-Hydroxykynurenine     | 0.230608     | 0.8203717  | 1.0000000        |
| 4-Guanidinobutanoate    | -0.004258906 | 0.9966515  | 1.0000000        |
| 5-6-Dihydrouracil       | -0.6905045   | 0.499197   | 1.0000000        |
| 5-Methyl-Cytosine       | 0.5305116    | 0.6026192  | 1.0000000        |
| 5-Oxolproline           | -0.5871436   | 0.5648245  | 1.0000000        |
| Adenine                 | -1.852346    | 0.08142102 | 1.0000000        |
| Alpha-D-Glucose         | -0.3498878   | 0.7307201  | 1.0000000        |
| Alpha-Ketoglutaric_Acid | 0.8881595    | 0.3868492  | 1.0000000        |
| Beta-Alanine            | -0.745945    | 0.4658911  | 1.0000000        |
| Betaine                 | 2.228967     | 0.03959736 | 1.0000000        |
| Citrate                 | 0.7555076    | 0.4602851  | 1.0000000        |
| Citrulline              | 1.085472     | 0.2928661  | 1.0000000        |
| Creatine                | -0.04720437  | 0.9629005  | 1.0000000        |
| Creatinine              | -0.697333    | 0.4950215  | 1.0000000        |
| Cytidine                | -0.9709861   | 0.3451688  | 1.0000000        |
| Deoxycarnitine          | 2.291718     | 0.03495995 | 1.0000000        |
| D-Pantothenic_Acid      | -0.515509    | 0.6128363  | 1.0000000        |
| D-Ribose-5-Phosphate    | 0.7285078    | 0.4762194  | 1.0000000        |
| Fumarate                | -0.2065519   | 0.8388135  | 1.0000000        |
| Glycerol                | 1.778088     | 0.09327977 | 1.0000000        |
| Glycine                 | -1.170332    | 0.2580129  | 1.0000000        |
| Guanosine               | -0.3944407   | 0.6981601  | 1.0000000        |
| Homocysteine            | -1.208516    | 0.2433911  | 1.0000000        |
| Inosine                 | -0.4535935   | 0.6558582  | 1.0000000        |
| L-Arginine              | 1.039705     | 0.3130391  | 1.0000000        |
| L-Asparagine            | 1.055179     | 0.3061097  | 1.0000000        |
| L-Carnitine             | 0.05194707   | 0.9591764  | 1.0000000        |
| L-Cystine               | -1.019774    | 0.3221297  | 1.0000000        |
| L-Eucine                | 0.7974545    | 0.4361847  | 1.0000000        |
| L-Glutamine             | 0.1255097    | 0.9015924  | 1.0000000        |
| L-Histidine             | -2.224383    | 0.03995754 | 1.0000000        |
| L-Isoleucine            | 0.4068114    | 0.6892225  | 1.0000000        |

| Metabolite               | Pearson.s.r | p.value     | Adjusted p-value |
|--------------------------|-------------|-------------|------------------|
| L-Kynurenine             | 0.81042     | 0.4288985   | 1.0000000        |
| L-Methionine             | 0.6609769   | 0.5174854   | 1.0000000        |
| L-Phenylalanine          | 1.262137    | 0.223941    | 1.0000000        |
| L-Proline                | -0.6743488  | 0.5091567   | 1.0000000        |
| L-Serine                 | 0.2315568   | 0.8196465   | 1.0000000        |
| L-Threonine              | -0.8597396  | 0.4018944   | 1.0000000        |
| L-Tyrosine               | -0.6366414  | 0.5328381   | 1.0000000        |
| Myristic_acid            | -3.792096   | 0.001455611 | 0.0800586        |
| Methyl-L-Histidine       | 0.09310432  | 0.9269091   | 1.0000000        |
| N-Acetyl-DL-Methionine   | -0.5649823  | 0.5794659   | 1.0000000        |
| N-Acetyl-DL-Serine       | -0.07321936 | 0.9424862   | 1.0000000        |
| N-Acetylglycine          | 1.077057    | 0.2965022   | 1.0000000        |
| N-Acetyl-L-Aspartic_Acid | -0.2947842  | 0.7717282   | 1.0000000        |
| N-Acetylputrescine       | -1.606755   | 0.1265217   | 1.0000000        |
| Acetyl carnitine         | 2.088299    | 0.05212599  | 1.0000000        |
| Pipecolate               | -1.455369   | 0.1637853   | 1.0000000        |
| Spermidine               | -0.1228579  | 0.9036604   | 1.0000000        |
| Succinate                | 0.7075967   | 0.4887839   | 1.0000000        |
| Transaconitate           | 0.0178729   | 0.9859483   | 1.0000000        |
| Uracil                   | -0.1177506  | 0.9076453   | 1.0000000        |
| Urocanate                | -1.097814   | 0.2875924   | 1.0000000        |

```
which(jia_met_global_pearson_summary$`Adjusted p-value` < .05)
```

```
integer(0)
```

## Spearman's rho

```
jia_met_global_spearman <- lapply(seq(met_scaled),
  \ (i) suppressWarnings(
    cor.test(met_scaled[index_jia, i],
             datsn$Physician_Global_Assessment[index_jia],
             method = "spearman")))
jia_met_global_spearman_summary <- data.frame(Metabolite = names(met_scaled))
jia_met_global_spearman_summary <- cbind(jia_met_global_spearman_summary,
  t(sapply(jia_met_time_spearman, \ (i)
    data.frame(`spearman's r` = i$statistic,
              `p-value` = i$p.value))))
jia_met_global_spearman_summary$`Adjusted p-value` <-
  p.adjust(jia_met_global_spearman_summary$p.value, method = "holm")
kable(jia_met_global_spearman_summary, align = "r", row.names = FALSE)
```

| Metabolite           | spearman.s.r | p.value   | Adjusted p-value |
|----------------------|--------------|-----------|------------------|
| Lactate              | 1031.667     | 0.698772  | 1                |
| Malate               | 767.8557     | 0.1725532 | 1                |
| 3-Hydroxykynurenine  | 1072.793     | 0.8105369 | 1                |
| 4-Guanidinobutanoate | 1287.453     | 0.5976715 | 1                |
| 5-6-Dihydrouracil    | 1256.358     | 0.6775638 | 1                |
| 5-Methyl-Cytosine    | 999.5682     | 0.6153708 | 1                |

| Metabolite               | spearman.s.r | p.value    | Adjusted p-value |
|--------------------------|--------------|------------|------------------|
| 5-Oxolproline            | 1257.361     | 0.6749287  | 1                |
| Adenine                  | 1684.675     | 0.03855387 | 1                |
| Alpha-D-Glucose          | 1211.219     | 0.7994389  | 1                |
| Alpha-Ketoglutaric_Acid  | 858.1333     | 0.3074748  | 1                |
| Beta-Alanine             | 1363.688     | 0.4207626  | 1                |
| Betaine                  | 602.3468     | 0.041496   | 1                |
| Citrate                  | 879.1981     | 0.3461523  | 1                |
| Citrulline               | 913.3029     | 0.4144138  | 1                |
| Creatine                 | 979.5065     | 0.5653745  | 1                |
| Creatinine               | 1503.117     | 0.1838198  | 1                |
| Cytidine                 | 1220.247     | 0.7746057  | 1                |
| Deoxycarnitine           | 598.3344     | 0.03979441 | 1                |
| D-Pantothenic_Acid       | 1069.784     | 0.8022101  | 1                |
| D-Ribose-5-Phosphate     | 947.4078     | 0.4893162  | 1                |
| Fumarate                 | 1122.948     | 0.9515359  | 1                |
| Glycerol                 | 587.3005     | 0.03539137 | 1                |
| Glycine                  | 1477.036     | 0.2191074  | 1                |
| Guanosine                | 1300.494     | 0.5653745  | 1                |
| Homocysteine             | 1223.256     | 0.766373   | 1                |
| Inosine                  | 1243.318     | 0.7121377  | 1                |
| L-Arginine               | 979.5065     | 0.5653745  | 1                |
| L-Asparagine             | 996.5589     | 0.6077597  | 1                |
| L-Carnitine              | 1030.664     | 0.6961089  | 1                |
| L-Cystine                | 1496.095     | 0.1929174  | 1                |
| L-Eucine                 | 931.3584     | 0.453272   | 1                |
| L-Glutamine              | 1229.275     | 0.7499802  | 1                |
| L-Histidine              | 1685.678     | 0.03814706 | 1                |
| L-Isoleucine             | 1050.725     | 0.7499802  | 1                |
| L-Kynurenine             | 884.2135     | 0.3557579  | 1                |
| L-Methionine             | 1071.79      | 0.8077591  | 1                |
| L-Phenylalanine          | 709.6768     | 0.1110978  | 1                |
| L-Proline                | 1255.355     | 0.6802026  | 1                |
| L-Serine                 | 1090.849     | 0.8608784  | 1                |
| L-Threonine              | 1480.046     | 0.2148256  | 1                |
| L-Tyrosine               | 1270.401     | 0.6410103  | 1                |
| Myristic_acid            | 1745.863     | 0.01919564 | 1                |
| Methyl-L-Histidine       | 1067.778     | 0.7966701  | 1                |
| N-Acetyl-DL-Methionine   | 1224.259     | 0.7636341  | 1                |
| N-Acetyl-DL-Serine       | 1321.558     | 0.5148828  | 1                |
| N-Acetylglycine          | 846.0963     | 0.2865936  | 1                |
| N-Acetyl-L-Aspartic_Acid | 1468.009     | 0.2322848  | 1                |
| N-Acetylputrescine       | 1481.049     | 0.2134106  | 1                |
| Acetylcarnitine          | 547.1771     | 0.02247344 | 1                |
| Pipecolate               | 1482.052     | 0.2120018  | 1                |
| Spermidine               | 1304.506     | 0.5555929  | 1                |
| Succinate                | 888.2258     | 0.3635512  | 1                |
| Transaconitate           | 1051.729     | 0.7527054  | 1                |
| Uracil                   | 1108.904     | 0.9117391  | 1                |
| Urocanate                | 1222.253     | 0.7691146  | 1                |

```
which(jia_met_global_spearman_summary$`Adjusted p-value` < .05)
```

```
integer(0)
```

No correlations between metabolite levels and physician global assessment are significant
